# Supplementary material for: Synergistic action of master transcription factors controls epithelial-to-mesenchymal transition
Source: PubMed Central journal article supplement — Nucleic Acids Res. 2016 Feb 28;44(6):2514–27. doi: 10.1093/nar/gkw126 (PMC4824118; doi:10.1093/nar/gkw126), 2016-02-28
Supplement: supp_gkw126_nar-03286-n-2015-File009.pdf [file supp_gkw126_nar-03286-n-2015-File009.pdf]

## **Supplemental Information**

### **Synergistic action of master transcription factors controls epithelial-to-mesenchymal transition**

Hongyuan Chang<sup>1,4\*</sup>, Yuwei Liu<sup>1\*</sup>, Mengzhu Xue<sup>1\*</sup>, Haiyue Liu<sup>2,4</sup>, Shaowei Du<sup>1</sup>, Liwen Zhang<sup>1,3,4,5</sup>, Peng Wang<sup>1,4,5†</sup>

1. Laboratory of Systems Biology, Shanghai Advanced Research Institute, Chinese Academy of Sciences
2. Shanghai Institute of Biochemistry and Cell Biology, Shanghai Institutes for Biological Sciences, Chinese Academy of Sciences
3. Shanghai Institute of Materia Medica, Chinese Academy of Sciences
4. University of Chinese Academy of Sciences
5. School of Life Science and Technology, ShanghaiTech University

<sup>†</sup>To whom correspondence should be addressed. Tel: 86-21-20350913;

Fax: 86-21-20350912; E-mail: [wangpeng@sari.ac.cn](mailto:wangpeng@sari.ac.cn)

**Table S1.** Lists of genes differentially expressed during TGF- $\beta$ -induced EMT.

|                       |                                                                                                                                                                                                                                                                                                                                                                                                                                                                                                                                                                                                                                                                                                                                                                                                                                                                                                                                                                                                                                                                                                                                                                                                                                                                                                                                                                                                                                                                                                                                                                                                                                                                                                                                                                                                                                                                                                                                                                                                                                                                                                                                                                                                                                                                                                                                                                                                                                                                                                                                                                                                                                                                                                                                                                                                                                                                                                                                                                                                                                                                                                                                                                                                                                                                                                                                                                                                                                                                                                                                                                                                                                                                 |
|-----------------------|-----------------------------------------------------------------------------------------------------------------------------------------------------------------------------------------------------------------------------------------------------------------------------------------------------------------------------------------------------------------------------------------------------------------------------------------------------------------------------------------------------------------------------------------------------------------------------------------------------------------------------------------------------------------------------------------------------------------------------------------------------------------------------------------------------------------------------------------------------------------------------------------------------------------------------------------------------------------------------------------------------------------------------------------------------------------------------------------------------------------------------------------------------------------------------------------------------------------------------------------------------------------------------------------------------------------------------------------------------------------------------------------------------------------------------------------------------------------------------------------------------------------------------------------------------------------------------------------------------------------------------------------------------------------------------------------------------------------------------------------------------------------------------------------------------------------------------------------------------------------------------------------------------------------------------------------------------------------------------------------------------------------------------------------------------------------------------------------------------------------------------------------------------------------------------------------------------------------------------------------------------------------------------------------------------------------------------------------------------------------------------------------------------------------------------------------------------------------------------------------------------------------------------------------------------------------------------------------------------------------------------------------------------------------------------------------------------------------------------------------------------------------------------------------------------------------------------------------------------------------------------------------------------------------------------------------------------------------------------------------------------------------------------------------------------------------------------------------------------------------------------------------------------------------------------------------------------------------------------------------------------------------------------------------------------------------------------------------------------------------------------------------------------------------------------------------------------------------------------------------------------------------------------------------------------------------------------------------------------------------------------------------------------------------|
| Epithelial-high genes | <p> ABC B6, ABC C1, ABC C2, ABC C3, ABC C4, ABC D3, ABC G2, ABHD3, ABHD4, ACAA2, ACAD9, ACADSB, ACAT2, ACOT13, ACSM3, ACY1, ADAM15, ADCY3, ADI1, ADK, ADM, ADORA2B, AFG3L2, AGFG1, AGPAT5, AGPAT9, AGR2, AHCYL1, AIFM1, AIMP1, AJUBA, AKR1B1, AKR1B10, AKR1C1, AKR1C2, AKR1C3, ALCAM, ALDH3A1, ALDH3A2, ALDH3B1, ALDH9A1, ALDOA, ALYREF, ANAPC13, ANKEF1, ANKRD18A, ANKRD18B, ANKRD54, ANLN, ANP32E, ANXA3, ANXA4, AP1M1, AP2B1, APITD1, APOC1, AR, AREG, ARHGAP11A, ARHGAP26, ARRB2, ASB9, ASF1B, ASPH, ATAD2, ATAD5, ATG10, ATP2A2, ATP2B1, ATP5G1, ATP6V1E2, ATP8B1, ATPAF1, ATXN10, AURKA, AVPI1, B4GALNT1, B4GALT4, B9D1, BACE2, BAG1, BAG2, BARD1, BIN1, BIRC5, BLM, BNIP3, BRCA1, BRCC3, BRI3BP, BRIP1, BRIX1, BSG, BUB1B, C10orf54, C11orf24, C12orf4, C14orf80, C1QBP, C1R, C1S, C1orf112, C2CD5, C3, C3orf14, C5, C7orf50, CA12, CACYBP, CAMK2D, CAV1, CBR1, CCDC34, CCDC85C, CCNA2, CCNB1, CCND3, CCNE1, CCNF, CD109, CD320, CD99L2, CDC20, CDC25B, CDC42EP4, CDC45, CDC6, CDCA2, CDCA3, CDCA4, CDCA5, CDCA7, CDCA7L, CDCA8, CDH1, CDK1, CDK2, CDK5RAP2, CDKN3, CEACAM6, CELSR1, CENPE, CENPH, CENPI, CENPK, CENPM, CENPN, CENPO, CENPU, CENPW, CEP250, CEP55, CEP78, CEP85, CFD, CFL2, CHAF1A, CHEK2, CHKA, CHML, CHP1, CHRAC1, CKAP2, CKB, CLASP2, CLIP1, CLMN, CLN6, CLSPN, CLTC, CNOT1, CNTNAP3, COASY, COMTD1, COPG2, COPS7A, COQ2, COQ7, COQ9, COTL1, COX15, CP, CPEB2, CPNE7, CPS1, CPT1A, CRIP1, CSE1L, CSGALNACT1, CSTF2, CTD-2600O9.1, CTNNAL1, CTNND1, CTSC, CTSD, CTSS, CUL4B, CUTC, CWF19L1, CXCL1, CXCL5, CYB5A, CYB5B, CYCS, CYP1B1, CYP4F3, CYTH3, DAK, DARS2, DBF4, DCAF7, DCDC2, DCLRE1A, DCTPP1, DCXR, DDA1, DDX1, DDX11, DDX18, DDX24, DDX39A, DDX46, DEPDC1, DEPDC1B, DESI1, DHFR, DHRS4L2, DHX57, DHX9, DIAPH3, DIO2, DKK1, DLAT, DNA2, DNM2, DOCK5, DONSON, DPH6, DPY19L3, DSN1, DST, DSTNP2, DTL, DTYMK, DUSP4, DUSP5, DZIP3, E2F1, EARS2, EBP, ECH1, ECT2, EDN1, EED, EFCAB11, EFHD2, EFTUD2, EIF2AK1, EIF3B, EIF4A3, EIF5A, ELF3, ELOVL6, EMC9, EME1, EML4, EMP2, ENO1, ENTPD6, EPDR1, EPHX1, EPT1, ERCC6L, EREG, ERMP1, ESCO2, EXO1, EXOC6, EXOSC2, EXOSC9, EZH2, EZR, FADS3, FAM107B, FAM111B, FAM20B, FAM20C, FAM216A, FAM83D, FANCA, FANCD2, FANCG, FANCI, FARP2, FARSB, FXR, FECH, FEN1, FGA, FGB, FGL1, FH, FIGNL1, FLOT1, FLVCR1, FOPNL, FOXRED1, FTH1, FTL, G6PD, GALM, GAMT, GAPDH, GART, GATS, GATSL2, GBE1, GCLC, GCLM, GCNT2, GDF15, GEMIN4, GGA2, GGT1, GINS1, GINS2, GINS4, GLA, GLIS3, GLP2R, GLYR1, GMNN, GMPPB, GMPS, GNE, GOT2, GPC1, GPCPD1, GPD2, GPI, GPRC5A, GPX2, GSE1, GSR, GTSE1, H2AFX, H2AFY, HACL1, HADH, HAT1, HAUS6, HDHD1, HEATR5A, HELLS, HFE, HHEX, HIF1A, HILPDA, HIP1, HIST1H1D, HIST1H1E, HIST1H2AI, HIST1H2BI, HIST1H4A, HIST1H4I, HIST3H2A, HIST3H2BB, HKDC1, HMBS, HMCES, HMGA1, HMGB2, HMGB3, HMGCS1, HMGN2, HMGN3, HMMR, HNRNPA2B1, HNRNPR, HP1BP3, HPS3, HSD17B8, HSDL2, HSP90AA1, HSPA14, HSPA1A, HSPA1B, HSPA4, HSPA4L, HSPE1, HYLS1, ICT1, IDH2, IFI35, IFRD2, IFT122, IFT81, IFT88, IGFBP6, IL6ST, ILF3, IMMP2L, IMPA2, INCENP, INHBB, INSL4, IPO11, IRF2BP2, ISYNA1, ITGB3BP, ITGB5, JAK1, JUND, KAT5, KCTD1, KCTD3, KIAA0101, KIAA0391, KIAA1524, KIAA1598, KIF11, KIF14, KIF20B, KIF22, KIF23, KITLG, KLF5, KLHDC4, KNSTRN, KNTC1, KPNA2, KPNB1, KRT18, KRT19, KRT8, KYNU, LACTB2, LAPTM4B, LAS1L, LASP1, LBR, LCN2, LDHB, LETM1, LIG1, LIG3, LIMD1, LINC00467, LITAF, LLGL2, LMNA, LMO7, LPAR1, LPCAT1, LPIN1, LRP5, LRP8, LRPPRC, LRR1, LRRC16A, LRRC23, LRRC58, LRRC8D, LSM4, LSMD1, LUC7L2, LXN, LY6E, LYN, MAD2L1, MAGOHB, MALL, MAP2K6, MAP3K14, MAP4K3, MAPKAPK3, MASTL, MCCC2, MCM10, MCM2, MCM3, MCM4, MCM5, MCM6, MCM7, MCM8, MCM9, MCU, MDH2, ME1, MEIS2, </p> |
|-----------------------|-----------------------------------------------------------------------------------------------------------------------------------------------------------------------------------------------------------------------------------------------------------------------------------------------------------------------------------------------------------------------------------------------------------------------------------------------------------------------------------------------------------------------------------------------------------------------------------------------------------------------------------------------------------------------------------------------------------------------------------------------------------------------------------------------------------------------------------------------------------------------------------------------------------------------------------------------------------------------------------------------------------------------------------------------------------------------------------------------------------------------------------------------------------------------------------------------------------------------------------------------------------------------------------------------------------------------------------------------------------------------------------------------------------------------------------------------------------------------------------------------------------------------------------------------------------------------------------------------------------------------------------------------------------------------------------------------------------------------------------------------------------------------------------------------------------------------------------------------------------------------------------------------------------------------------------------------------------------------------------------------------------------------------------------------------------------------------------------------------------------------------------------------------------------------------------------------------------------------------------------------------------------------------------------------------------------------------------------------------------------------------------------------------------------------------------------------------------------------------------------------------------------------------------------------------------------------------------------------------------------------------------------------------------------------------------------------------------------------------------------------------------------------------------------------------------------------------------------------------------------------------------------------------------------------------------------------------------------------------------------------------------------------------------------------------------------------------------------------------------------------------------------------------------------------------------------------------------------------------------------------------------------------------------------------------------------------------------------------------------------------------------------------------------------------------------------------------------------------------------------------------------------------------------------------------------------------------------------------------------------------------------------------------------------|

|                               |                                                                                                                                                                                                                                                                                                                                                                                                                                                                                                                                                                                                                                                                                                                                                                                                                                                                                                                                                                                                                                                                                                                                                                                                                                                                                                                                                                                                                                                                                                                                                                                                                                                                                                                                                                                                                                                                                                                                                                                                                                                                                                                                                                                                                                                                                                                                                                                                                                                                                                                                                                                                                                                                                                                                                                                                                                                                                                                                                                                                                                                                                                                                                                                                                                                                                                                   |
|-------------------------------|-------------------------------------------------------------------------------------------------------------------------------------------------------------------------------------------------------------------------------------------------------------------------------------------------------------------------------------------------------------------------------------------------------------------------------------------------------------------------------------------------------------------------------------------------------------------------------------------------------------------------------------------------------------------------------------------------------------------------------------------------------------------------------------------------------------------------------------------------------------------------------------------------------------------------------------------------------------------------------------------------------------------------------------------------------------------------------------------------------------------------------------------------------------------------------------------------------------------------------------------------------------------------------------------------------------------------------------------------------------------------------------------------------------------------------------------------------------------------------------------------------------------------------------------------------------------------------------------------------------------------------------------------------------------------------------------------------------------------------------------------------------------------------------------------------------------------------------------------------------------------------------------------------------------------------------------------------------------------------------------------------------------------------------------------------------------------------------------------------------------------------------------------------------------------------------------------------------------------------------------------------------------------------------------------------------------------------------------------------------------------------------------------------------------------------------------------------------------------------------------------------------------------------------------------------------------------------------------------------------------------------------------------------------------------------------------------------------------------------------------------------------------------------------------------------------------------------------------------------------------------------------------------------------------------------------------------------------------------------------------------------------------------------------------------------------------------------------------------------------------------------------------------------------------------------------------------------------------------------------------------------------------------------------------------------------------|
|                               | <p>MELK, MEPCE, METRN, MFF, MFI2, MGLL, MID1, MIS18BP1, MITF, MLF2, MLH1, MLK4, MLTK, MMAB, MMP24, MMP24-AS1, MMP7, MND1, MOK, MPDU1, MPHOSPH6, MPHOSPH9, MPP3, MRPL54, MRPS35, MRTO4, MSH2, MSH5, MSH6, MTHFD1, MTSS1L, MVD, MYBL2, MYCBP, MYLK, MYO15B, MYO18A, MYO1B, MYO5C, MYOF, MZT1, NAA15, NAGLU, NAMPT, NAT10, NCAPD2, NCAPD3, NCAPG, NCAPG2, NCAPH, NCAPH2, NCBP1, NCL, NCOA7, NDC1, NDC80, NEDD4L, NEIL3, NEK2, NEK6, NELFCD, NEO1, NFX1, NLN, NME1, NOC2L, NOL12, NOLC1, NOP56, NOP58, NQO1, NR0B1, NR2F6, NR3C1, NSF, NSUN2, NT5C2, NTHL1, NTN4, NUDT1, NUDT15, NUP153, NUP155, NUP160, NUP205, NUP210, NUP35, NUP50, NUP98, NUPL1, NUSAP1, NXN, OAS3, OIP5, OLFML2A, OMA1, ORC1, ORC5, OSGIN1, PA2G4, PAAF1, PAGR1, PAICS, PAPSS2, PARD6B, PARN, PARP2, PARPBP, PARVB, PAXIP1, PBK, PBX1, PCBD1, PCCB, PCGF5, PCNA, PCSK6, PDLIM1, PDLIM5, PEG10, PFAS, PFKFB3, PGAM1, PGD, PHACTR2, PHF19, PHKB, PHTF2, PIGW, PIR, PKD2, PKDCC, PKMYT1, PKP3, PLA2G16, PLA2G4A, PLK1, PLK2, PLK4, PLS1, PM20D2, PMM2, PNKD, POF1B, POLA1, POLA2, POLD2, POLDIP2, POLE, POLE2, POLQ, POLR2D, POLR2E, POLR2L, POLR3K, POR, PPCDC, PPFIBP2, PPIF, PPP2R1B, PPP2R2C, PPP2R5D, PRC1, PRDX3, PRIM1, PRIM2, PRKAG2, PRMT5, PROCR, PRR13, PRSS23, PSIP1, PSMC5, PSMD1, PSMD11, PSMD5, PSME2, PTBP1, PTGES3, PTGR1, PTGR2, PTGS2, PTP4A1, PTPN2, PTPRG, PTPRJ, QDPR, QTRTD1, RAB10, RAB11FIP1, RAB15, RAB27B, RACGAP1, RAD18, RAD51AP1, RAD51C, RAD54B, RANBP1, RBBP8, RBL1, RBPMS, RCCD1, RDH10, RFC2, RFC3, RFC4, RFC5, RFFL, RFWD3, RFX5, RHNO1, RHOBTB3, RHOQ, RHPN2, RITA1, RMI2, RN7SL3, RNASEH2A, RNF115, ROCK2, RP1-60O19.1, RP11-396K3.1, RP11-443P15.2, RP11-674N23.1, RPA1, RPA2, RPA3, RPRG1P1L, RPL13P5, RPL39L, RPS6KA3, RRM1, RRM2, RUVBL1, RUVBL2, S100A4, S1PR3, SARS2, SCARA3, SCARB1, SDPR, SEC23B, SEC23IP, SEMA4B, SEPHS2, SETD7, SF3B2, SGK223, SGOL1, SGOL2, SH2D4A, SH3BP4, SHCBP1, SHMT1, SIVA1, SKA1, SKA2, SLBP, SLC12A2, SLC16A5, SLC23A2, SLC25A10, SLC25A11, SLC27A2, SLC2A4RG, SLC35A4, SLC45A4, SLC47A1, SLC48A1, SLC6A6, SLC9A3R1, SLC9A3R2, SLPI, SMAD3, SMAD6, SMC1A, SMC2, SMC3, SMCHD1, SMPD4, SNORD3B-2, SNRNP200, SNRNP25, SNRPA1, SNRPD1, SNX8, SOGA2, SORD, SPAG5, SPATA5, SPC24, SPC25, SQSTM1, SRBD1, SRC, SREBF1, SRRT, SRSF2, SRXN1, SSBP4, SSRP1, STAT1, STAT6, STIL, STIP1, STOM, STRA13, SUCLG2, SULT1A4, SUV39H2, SUZ12, SVIL, SWAP70, SYNGR2, SYNJ2, SYNM, TACC1, TACC2, TACC3, TACO1, TANGO6, TARS2, TBC1D31, TBC1D5, TBCE, TBL1X, TCERG1, TEAD4, TESC, TEX10, TFDP1, TFRC, TGFBR2, THEM4, THOC3, THOP1, THRAP3, TIMELESS, TIMM23, TIPIN, TK1, TKT, TLCD1, TLE4, TM4SF18, TM4SF20, TM4SF4, TM7SF2, TMEM106B, TMEM14B, TMEM199, TMEM56, TMEM97, TMOD3, TMPO, TMX4, TNFAIP2, TNS3, TOB1, TOMM40, TOMM70A, TOP2A, TOPBP1, TOR3A, TPCN1, TPM3P9, TPP2, TPX2, TRAF2, TRAM1, TRAP1, TRIM16, TRIM16L, TRIML2, TRIOBP, TRIP13, TRIP6, TRMT2B, TRMT6, TRNP1, TSEN54, TSPAN4, TSR1, TTF2, TTI1, TUBA1B, TUBB4B, TUBG1, TXN, TXN2, TXNRD1, TXNRD2, TYMS, U2AF2, UBAP2L, UBE2S, UBE2T, UBR7, UGCG, UGDH, UGP2, UHRF1, UHRF1BP1L, UNG, UNKL, UPK1B, UPP1, USP1, USP10, USP5, USP53, UTP11L, VCP, VPRBP, VRK1, WBP11, WBSCR16, WDHD1, WDR34, WDR62, WDR76, WDR77, WEE1, WISP2, WNT7B, WRAP53, WWP2, XPO7, XRCC2, XRCC3, YTHDC2, ZBED5, ZFAND5, ZFX, ZNF587B, ZNF789, ZWILCH, ZWINT</p> |
| <p>Mesenchymal-high genes</p> | <p>AADAC, ABHD2, ABLIM3, AC007362.1, AC098614.2, ACP6, ACSF2, ADAM19, ADAMTS6, ADAMTS9, ADD3, AFAP1L2, AKR1E2, AKT3, AL132709.5, AL132709.8, AL589743.1, ALPK2, AMIGO2, ANKRD50, ANXA8L2, AP1S2, APBB2, APPL2, ARHGEF40, ARL15, ARL4C, ARL4D, ARNTL2, ASL, ATP13A2, ATXN1, B4GALNT4, BAZ2B, BBX, BCAS3, BDNF, BHLHE40, BICD1, BMP1, BMP6, BPGM, BTG1, C11orf80, C12orf76, C3orf52, C8orf4, CACNB3, CALCOCO1, CAMK2G, CAPRIN2, CASC10, CASC15, CBLB, CCDC80, CCDC92, CCNG2, CD151, CD44, CD58, CD59, CD70, CDH11, CDH2, CDH4, CDH6, CEACAM19,</p>                                                                                                                                                                                                                                                                                                                                                                                                                                                                                                                                                                                                                                                                                                                                                                                                                                                                                                                                                                                                                                                                                                                                                                                                                                                                                                                                                                                                                                                                                                                                                                                                                                                                                                                                                                                                                                                                                                                                                                                                                                                                                                                                                                                                                                                                                                                                                                                                                                                                                                                                                                                                                                                                                                                                                                  |

|                               |                                                                                                                                                                                                                                                                                                                                                                                                                                                                                                                                                                                                                                                                                                                                                                                                                                                                                                                                                                                                                                                                                                                                                                                                                                                                                                                                                                                                                                                                                                                                                                                                                                                                                                                                                                                                                                                                                                                                                                                                                                                                                                                                                                                                                                                                                                                                                                                                                                                                                                                                                                                                                                                                                                                                                                                                                                                                                                                                                                                                                                                                                                                                                                                                                                                                                                                                                                                                                                                                |
|-------------------------------|----------------------------------------------------------------------------------------------------------------------------------------------------------------------------------------------------------------------------------------------------------------------------------------------------------------------------------------------------------------------------------------------------------------------------------------------------------------------------------------------------------------------------------------------------------------------------------------------------------------------------------------------------------------------------------------------------------------------------------------------------------------------------------------------------------------------------------------------------------------------------------------------------------------------------------------------------------------------------------------------------------------------------------------------------------------------------------------------------------------------------------------------------------------------------------------------------------------------------------------------------------------------------------------------------------------------------------------------------------------------------------------------------------------------------------------------------------------------------------------------------------------------------------------------------------------------------------------------------------------------------------------------------------------------------------------------------------------------------------------------------------------------------------------------------------------------------------------------------------------------------------------------------------------------------------------------------------------------------------------------------------------------------------------------------------------------------------------------------------------------------------------------------------------------------------------------------------------------------------------------------------------------------------------------------------------------------------------------------------------------------------------------------------------------------------------------------------------------------------------------------------------------------------------------------------------------------------------------------------------------------------------------------------------------------------------------------------------------------------------------------------------------------------------------------------------------------------------------------------------------------------------------------------------------------------------------------------------------------------------------------------------------------------------------------------------------------------------------------------------------------------------------------------------------------------------------------------------------------------------------------------------------------------------------------------------------------------------------------------------------------------------------------------------------------------------------------------------|
|                               | <p>CEP170, CGB8, CHD9, CHST11, CITED4, CLDN2, CLIC4, CLIP2, CMTM3, CNPY4, COL22A1, COL4A1, COL4A2, COL4A3, COL4A4, COL5A2, COL7A1, CORO2B, CRLF1, CSNK1G3, CSRN1, CSRP2BP, CTD-2066L21.3, CTD-2314B22.3, CTD-2576D5.4, CTTNBP2NL, CYBRD1, DBN1, DCBLD1, DCDC1, DDIT4, DEPDC7, DFNA5, DGKA, DGKD, DHRS2, DIRC2, DIXDC1, DLG1, DNAJB2, DNAJB4, DNMBP, DOCK2, DOCK4, DPYD, DPYSL3, DSE, DSG2, DSP, DUSP1, DUSP10, DUSP6, DYRK1B, DYRK2, DZIP1, E2F5, EDEM3, EFEMP1, ELK3, ELL2, ELP4, EMB, ENDOD1, ENO3, ETV4, ETV5, EVA1A, EVA1B, F2R, F2RL1, FAM114A1, FAM168A, FAM214B, FAM43A, FAM89B, FAT3, FBN1, FBXO32, FER, FERMT1, FGD6, FHL1, FHOD3, FIBCD1, FKBP7, FLRT2, FN1, FNDC3A, FNDC3B, FOXP1, FOXS1, FP15737, FRMD6, FST, FSTL1, FUT8, FXYD5, GABARAPL1, GABRA5, GABRB3, GAL, GALNT1, GLIPR1, GLIPR2, GNG4, GOLGA8A, GOLGA8B, GPAM, GPC6, GPR137B, GRAMD1B, GREM1, GSN, HAS2, HBP1, HDAC5, HES1, HGSNAT, HLA-C, HMGA2, HRH1, HTR1D, HTRA1, IER3, IFNA1, IFNE, IFNWP19, IGFBP7, IGFL1, IGFL2, IGFL3, IGFL4, IL11, IL15, IL32, IL8, INHBA, INPP4B, INPPL1, ITGA1, ITGA11, ITGA2, ITGA3, ITGA5, ITGAV, ITGB6, IVNS1ABP, JAG1, JARID2, JMJD1C, KCNG1, KCNJ6, KCNMA1, KCNN4, KDM5B, KDSR, KIAA0556, KIAA1109, KIAA1549L, KIFC2, KIRREL3, KLF6, KLHL24, LAMB1, LAMC2, LARP6, LCE3D, LDLRAD4, LGMN, LHX8, LINC-PINT, LINC00152, LINC00941, LIX1L, LPCAT2, LPCAT4, LPHN2, LRP11, LRRC8C, LTBP1, LTBP2, LTBP3, LYPD1, MAML3, MAN2B1, MAP1LC3A, MAPK8IP3, MAPRE3, MARCH4, MBOAT2, MCL1, MEG3, MEG8, MEIS3, MEX3B, MFAP3L, MICAL1, MICAL2, MIR22HG, MIR31HG, MIR4435-1HG, MLLT11, MMP2, MORC4, MORF4L2, MRC2, MSC, MSN, MT1X, MT2A, MTAP, NAGK, NAP1L1, NBEA, NBPF20, NEBL, NFKBIZ, NGEF, NHS, NID1, NIPAL4, NKAIN4, NNMT, NOD1, NPC2, NPR3, NPTX1, NR1D2, NREP, NRG1, NRP2, NT5E, NUA1, OBSL1, OCIAD2, P4HA2, P4HA3, PAN3, PBXIP1, PCMTD1, PCMTD2, PDE4B, PDE4D, PDGFC, PDLIM7, PDP1, PDZK1, PEA15, PGM2L1, PHC1, PHC2, PHF20, PHLDA1, PICALM, PIGCP1, PIK3AP1, PIP4K2A, PIPNC1, PLAU, PLAUR, PLCB4, PLCXD2, PLEK2, PMAIP1, PMEPA1, PNRC1, PODXL, PPFIBP1, PPP1R18, PPP1R3C, PRR5L, PSD3, PSMD2, PTGFRN, PTHLH, PTK7, PTPRE, PTPRK, PYGL, QPCT, R3HDML, RAB3B, RAB8B, RAET1G, RAI14, RALB, RARB, RASAL2, RASGRF2, RASGRP3, RASSF10, RASSF8, RBP1, RELL1, RGL2, RGS2, RHOU, RND1, RNF182, RNF2, ROBO1, RP11-1002K11.1, RP11-145E5.5, RP11-166D19.1, RP11-180P8.1, RP11-244K5.8, RP11-420A23.1, RP11-479G22.8, RP11-572C15.6, RP11-65J21.3, RP11-706O15.5, RP11-709B3.2, RP11-757F18.5, RP11-81H3.2, RTKN, S100A13, S100A16, SACS, SAT1, SCARNA5, SCARNA7, SCG5, SCN9A, SDC4, SEC14L2, SEMA3C, SENP7, SERPINE2, SFRP1, SFXN3, SGCD, SGK1, SGSM2, SH3KBP1, SH3YL1, SIRPA, SLC16A4, SLC22A3, SLC25A29, SLC25A36, SLC25A37, SLC29A1, SLC2A3, SLC30A1, SLC35E2B, SLC35F2, SLC38A2, SLC39A10, SLC4A7, SLCO1B3, SLFN5, SLIT3, SLN, SMAD2, SMARCA1, SMOC1, SMYD3, SNHG14, SNORA53, SNORD116-20, SNORD3D, SOCS2, SOCS5, SOCS6, SOX4, SPARC, SPHK1, SPOCK1, SPRY2, SPSB1, SPTLC2, SRPX, STARD4, STAT2, STC1, STK38L, STRA6, STXBP5, SULF2, SYT1, SYT13, TAGLN, TCEAL1, TCEAL3, TCF4, TCP11L1, TCP11L2, TENM3, TGFB1, TGFB1I1, TGFB1, TGFB1I1, THBD, THBS1, THBS3, TIMP2, TIMP4, TIPARP, TLN2, TMEM156, TNFAIP6, TNFRSF10D, TNFRSF12A, TNKS, TNKS1BP1, TNS1, TOM1, TP53I3, TPM1, TPM2, TPST1, TSC22D1, TSC22D3, TSPAN2, TSPAN5, UBA6, UBD1, USP11, VCAN, VEGFA, VGLL3, VIM, VPS8, WLS, WNT5B, XYLT1, ZBED6, ZBTB38, ZEB1, ZFP36, ZFP36L1, ZFP90, ZKSCAN1, ZNF124, ZNF185, ZNF581</p> |
| <p>Partial-EMT-high genes</p> | <p>ABLIM1, AC009403.2, AC034220.3, ACAT1, ACLY, ACOX3, ADA, ADAM9, ADCY7, AGPAT2, AGPS, ALDH1A3, ANKLE2, AP1M2, ARCN1, ARFGAP1, ARHGEF18, ASCC2, ASS1, ATP13A3, BAIAP2L1, BLOC1S2, BTBD11, C15orf48, C2orf82, CAPN2, CARD10, CDC42EP3, CDC42SE1, CDR2, CDR2L, CERCAM, CLDN4, CLPTM1L, COL1A1, COL27A1, CPLX2, CTD-2377D24.6, CTIF, CTPS1, CXXC5, DAAM1, DDAH1, DDB2, DMPK, DNMT3B, DVL1, DZIP1L,</p>                                                                                                                                                                                                                                                                                                                                                                                                                                                                                                                                                                                                                                                                                                                                                                                                                                                                                                                                                                                                                                                                                                                                                                                                                                                                                                                                                                                                                                                                                                                                                                                                                                                                                                                                                                                                                                                                                                                                                                                                                                                                                                                                                                                                                                                                                                                                                                                                                                                                                                                                                                                                                                                                                                                                                                                                                                                                                                                                                                                                                                                           |



|                                                                                                                                                                                                                                                                                                                                                                                                                                                                                                                                                                                                                                                                                                                                                                                                                                                                                                                                                                                                                                                                                                                                                                                      |
|--------------------------------------------------------------------------------------------------------------------------------------------------------------------------------------------------------------------------------------------------------------------------------------------------------------------------------------------------------------------------------------------------------------------------------------------------------------------------------------------------------------------------------------------------------------------------------------------------------------------------------------------------------------------------------------------------------------------------------------------------------------------------------------------------------------------------------------------------------------------------------------------------------------------------------------------------------------------------------------------------------------------------------------------------------------------------------------------------------------------------------------------------------------------------------------|
| <p>ECE1, EFR3B, EHD4, EIF1AD, EIF5B, EML1, EPB41, EPS8L2, ETS2, F3, FAM101B, FAM129B, FAM177A1, FAM83G, FAM98A, FGF2, FGFR1, FITM2, FKBP11, FRYL, FSTL3, FURIN, GALNT14, GALNT18, GIPC1, GNB4, GOLGA4, GPR56, GRK5, GXYLT1, GXYLT2, HAPLN3, HINFP, HN1L, HNF4A, HPCAL1, HR, HSPB1, INO80C, ITPR3, JMJD6, JUNB, JUP, KANK2, KIAA0930, KIF16B, KIF21A, KIF3C, KRT7, KRT80, LAMB3, LBH, LFNG, LIMK2, LINC00842, LMNB2, LRRC59, LRRC8A, LTBP4, MAFK, MANF, MDGA1, METAP1, MFGE8, MFSD12, MICALL2, MYEOV, MYO1C, NCF2, NF2, NR1H3, NT5DC2, NUMBL, P2RY2, PACSIN3, PDCD6IP, PDGFB, PDXK, PFKP, PGRMC2, PHLDB1, PLCB3, PLS3, POLD4, POMT2, PPP1R13L, PPP1R14A, PRDX1, PRKAR2A, PRPS1, PTGES, PTPLB, PTRF, PVR, RASGRP1, RBMS3, RDX, RHOD, RHOF, RP11-509E16.1, RP3-416H24.1, RRAS, RSU1, S100A3, S1PR5, SAMD11, SELM, SEMA6B, SEPT9, SERINC2, SERPINE1, SFN, SGMS1, SIM2, SLC12A4, SLC22A5, SLC2A1, SLC2A8, SLC39A7, SLC41A2, SLC7A6, SLFNL1, SORL1, SPATS2, SPDL1, SULT2B1, SYNE1, TAPT1, TARSL2, TAX1BP3, TGFB2, TMC7, TMEM184A, TMEM256-PLSCR3, TNFAIP8, TOP3B, TPD52, TRAPPC10, TRIM47, TSPAN15, TTC7A, TUBA4A, TUBB6, TUFT1, UACA, UAP1, UBASH3B, UNC13D, USP31, VPS54, WDR1, WWC2</p> |
|--------------------------------------------------------------------------------------------------------------------------------------------------------------------------------------------------------------------------------------------------------------------------------------------------------------------------------------------------------------------------------------------------------------------------------------------------------------------------------------------------------------------------------------------------------------------------------------------------------------------------------------------------------------------------------------------------------------------------------------------------------------------------------------------------------------------------------------------------------------------------------------------------------------------------------------------------------------------------------------------------------------------------------------------------------------------------------------------------------------------------------------------------------------------------------------|

**Table S2.** Lists of transcription factors with a motif enrichment p-value < 0.05 in proximal enhancers, distal enhancers and enhancers within gene body.

|                                        | Epithelial-high gene enhancers                                                                                                                           | Partial-EMT-high gene enhancers                                                                                                                     | Mesenchymal-high gene enhancers                                                                                                                  |
|----------------------------------------|----------------------------------------------------------------------------------------------------------------------------------------------------------|-----------------------------------------------------------------------------------------------------------------------------------------------------|--------------------------------------------------------------------------------------------------------------------------------------------------|
| Proximal enhancers (<= 10 kb from TSS) | ARNTL2, E2F1, ELF3, ETS2, ETV4, FOXP1, HMGA1, HNF4A, JUNB, JUND, KLF5, KLF6, MAFK, MSC, NR1D2, PBX1, STAT1, STAT2, STAT6, TEAD4, TFDP1, ZFX              | E2F1, E2F5, ELK3, ETS2, ETV4, ETV5, FOXP1, HMGA1, HNF4A, JUNB, JUND, KLF5, KLF6, MAFK, NR2F6, NR3C1, SMAD3, SOX4, STAT1, STAT2, STAT6, TEAD4, ZFX   | E2F1, ELF3, ETS2, ETV4, ETV5, FOXP1, HNF4A, JUNB, JUND, KLF5, KLF6, MAFK, MSC, NR3C1, RFX5, STAT1, STAT2, STAT6                                  |
| Distal enhancers (> 10 kb from TSS)    | ARNTL2, BRCA1, E2F1, E2F5, ELF3, ETS2, ETV4, FOXP1, HNF4A, JUNB, JUND, MAFK, NR1D2, NR3C1, RFX5, STAT1, STAT2, STAT6, TEAD4                              | AR, ARNTL2, E2F1, ELF3, ETS2, ETV4, FOXP1, GLIS3, HHEX, HIF1A, JUNB, JUND, KLF6, MAFK, NR2F6, NR3C1, SMAD3, SOX4, STAT1, STAT2, STAT6, ZFX, ZKSCAN1 | E2F1, ELF3, ELK3, ETS2, ETV4, ETV5, JUNB, JUND, MAFK, NR1D2, NR3C1, RFX5, SMAD3, SOX4, STAT1, STAT2, STAT6, TEAD4, ZEB1                          |
| Enhancers within gene body             | ARNTL2, E2F1, ELF3, ELK3, ETS2, ETV4, ETV5, FOXP1, HNF4A, JUNB, JUND, KLF5, KLF6, MAFK, MSC, NR1D2, NR1H3, SOX4, SREBF1, STAT1, STAT2, STAT6, TEAD4, ZFX | AR, E2F1, ETV4, FOXP1, HNF4A, JUNB, JUND, KLF5, MAFK, NR2F6, NR3C1, SMAD3, SOX4, STAT1, STAT2, TEAD4, ZFX                                           | ELF3, ELK3, ETS2, ETV4, ETV5, FOXP1, HNF4A, JUNB, JUND, KLF5, KLF6, MAFK, MSC, NR3C1, RFX5, SMAD2, SMAD3, SOX4, STAT1, STAT2, STAT6, TEAD4, ZEB1 |

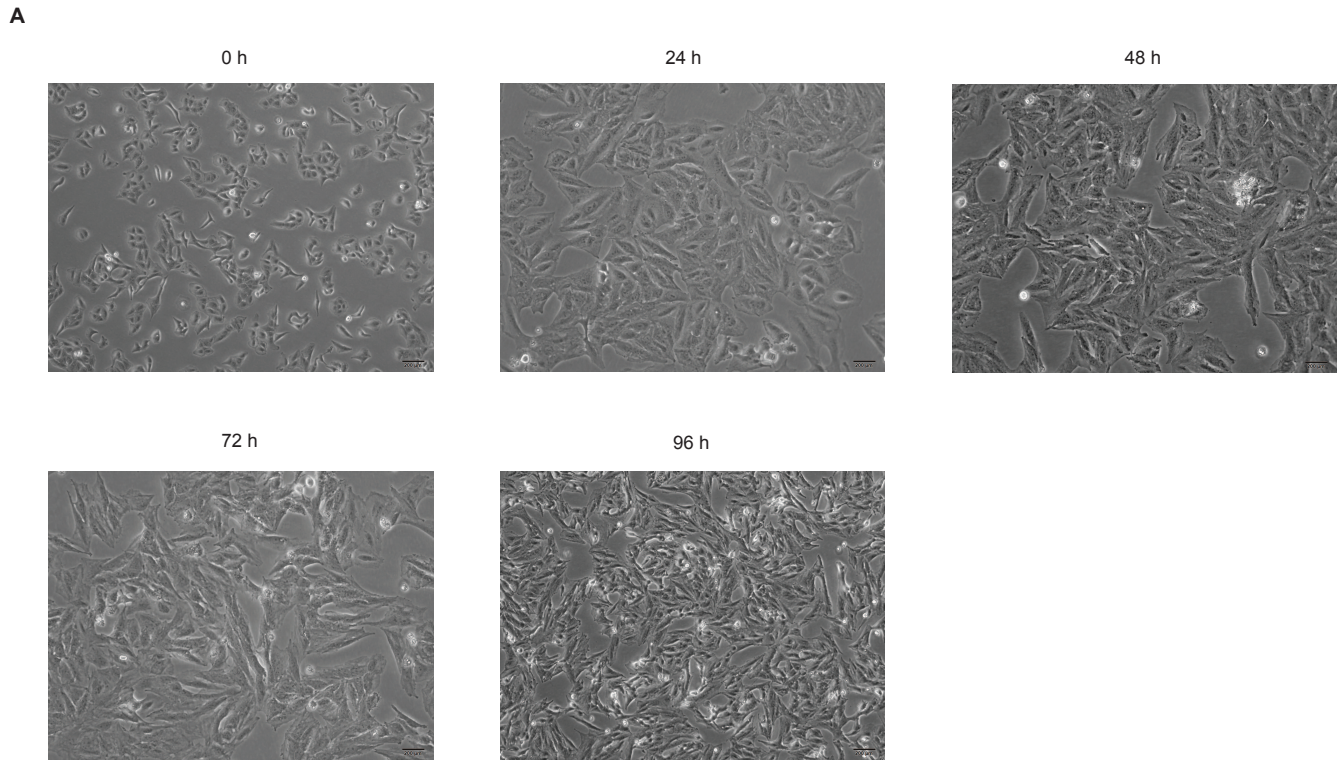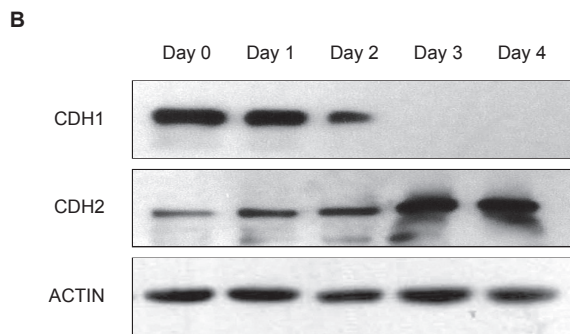

**Figure S1. TGF- $\beta$  induces EMT in A549 cells.**

**(A)** Morphology of A549 cells treated with TGF- $\beta$  for 5 days. **(B)** Protein abundance of EMT markers analyzed by Immunoblotting.

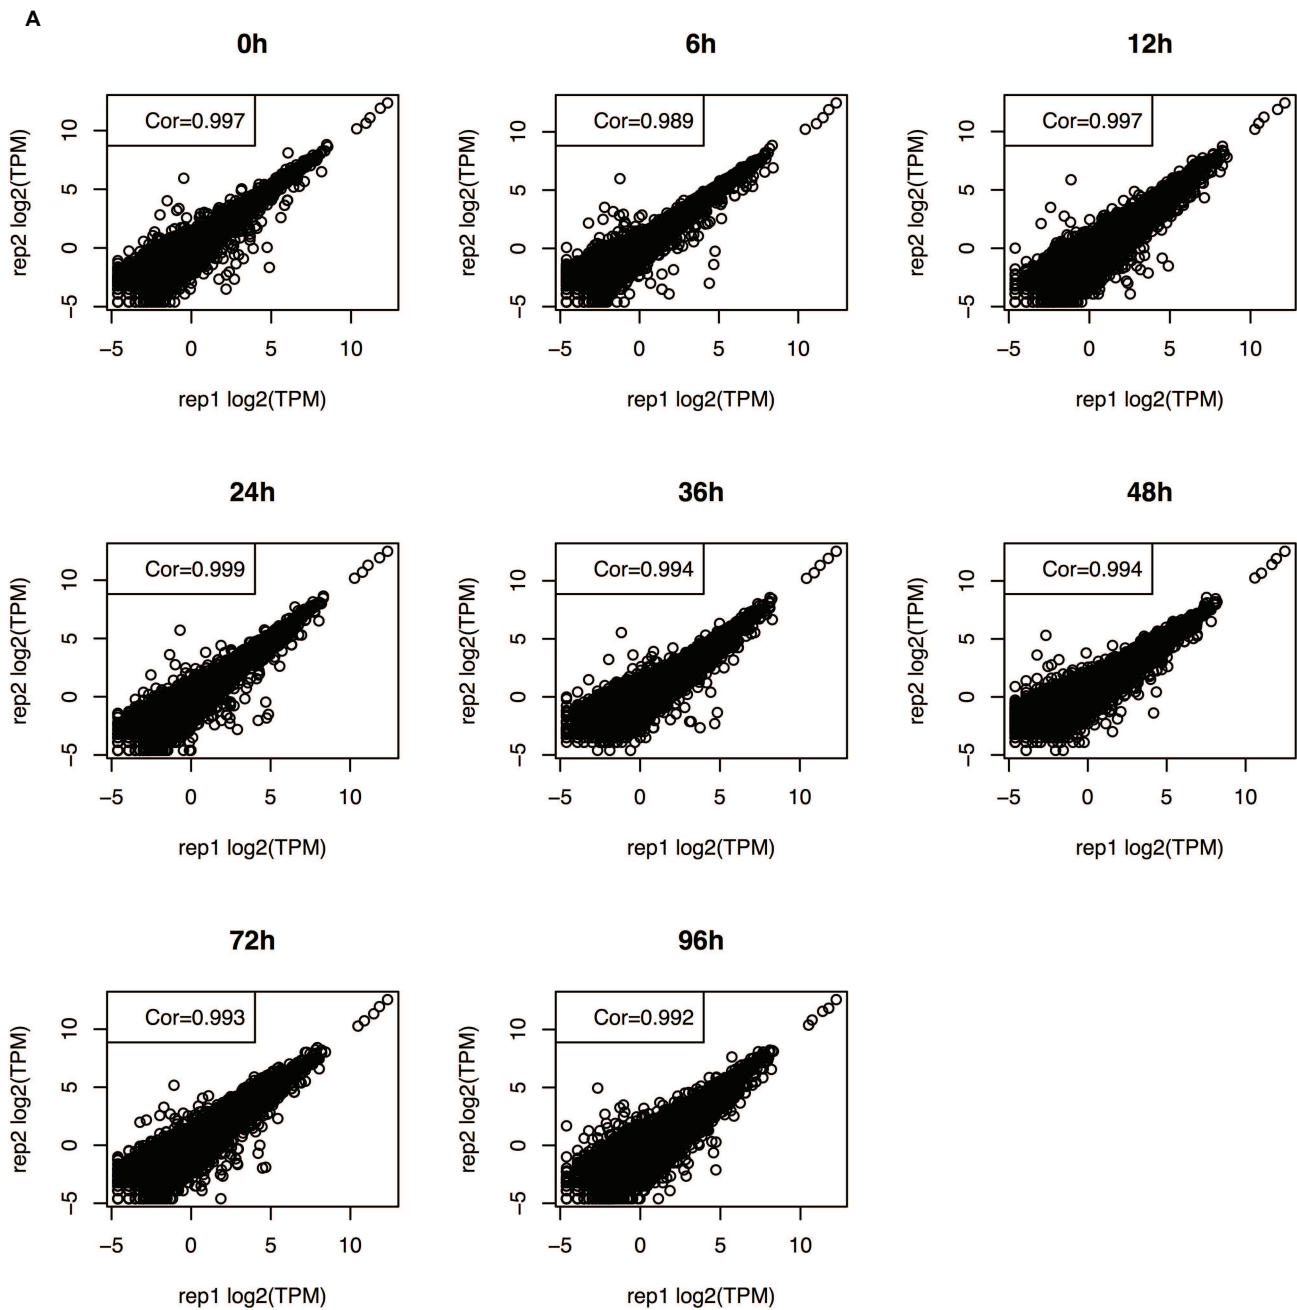

**B**

| Time course                 | 0h   | 6h   | 12h  | 24h  | 36h  | 48h  | 72h  | 96h  |
|-----------------------------|------|------|------|------|------|------|------|------|
| Rep1 Library Size (Million) | 37.3 | 43.5 | 41.5 | 36.7 | 44.3 | 45.4 | 37.2 | 39.0 |
| Rep2 Library Size (Million) | 36.6 | 39.4 | 40.1 | 36.1 | 39.0 | 40.2 | 39.5 | 37.5 |

**Figure S2. RNA-seq statistics.**

**(A)** Scatter plots of TPM (transition per million) showing robust correlation between biological replicates of RNA-seq. **(B)** Table summarizing number of reads per sample.

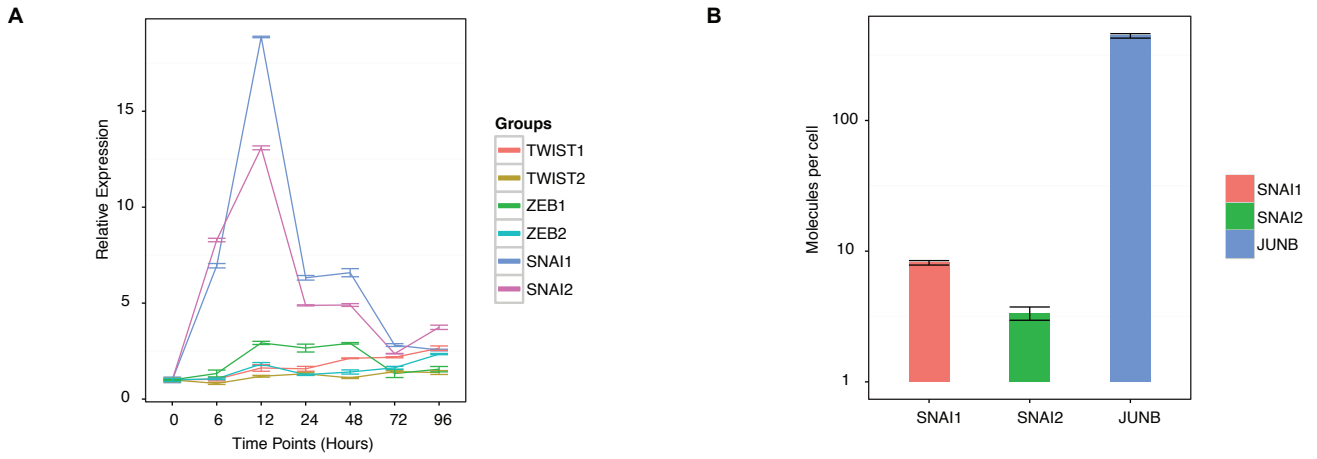

**Figure S3. PCR analyses of known Transcriptional drivers of EMT.**

**(A)** Time-course qPCR analyses showing the relative expression changes of SNAI1/2, TWIST1/2 and ZEB1/2 during TGF- $\beta$ -induced EMT. **(B)** Absolute qPCR analyses showing the molecules per cell for SNAI1, SNAI2 and JUNB at 12 h into TGF- $\beta$ -induced EMT.

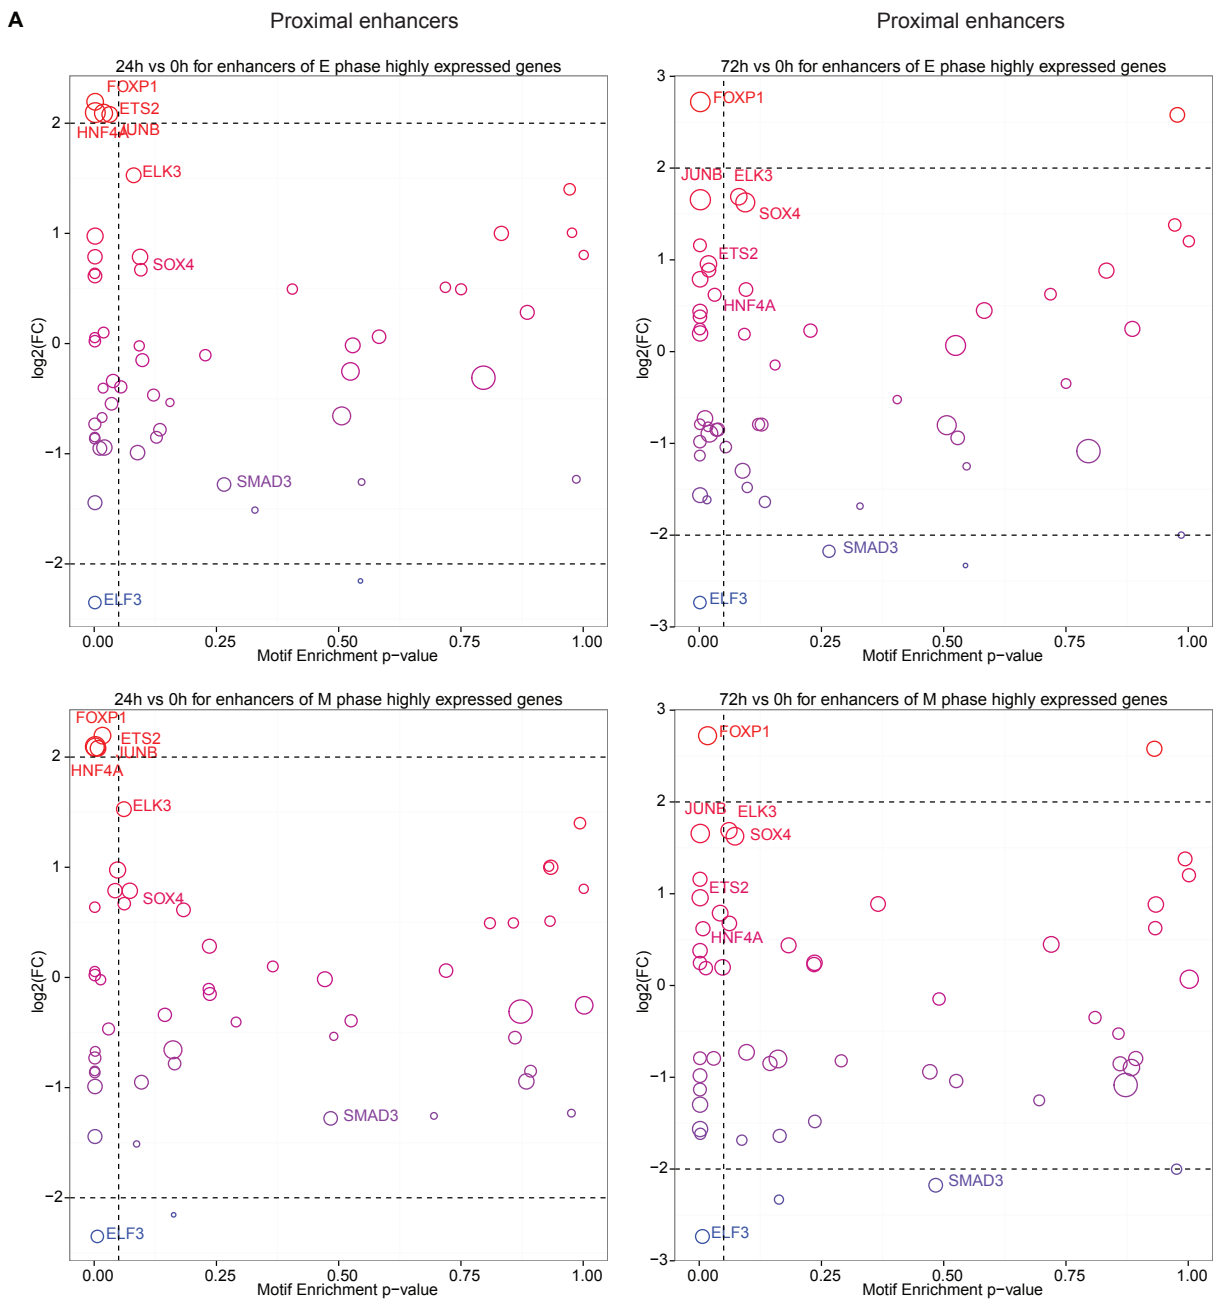

**B**

## Distal enhancers

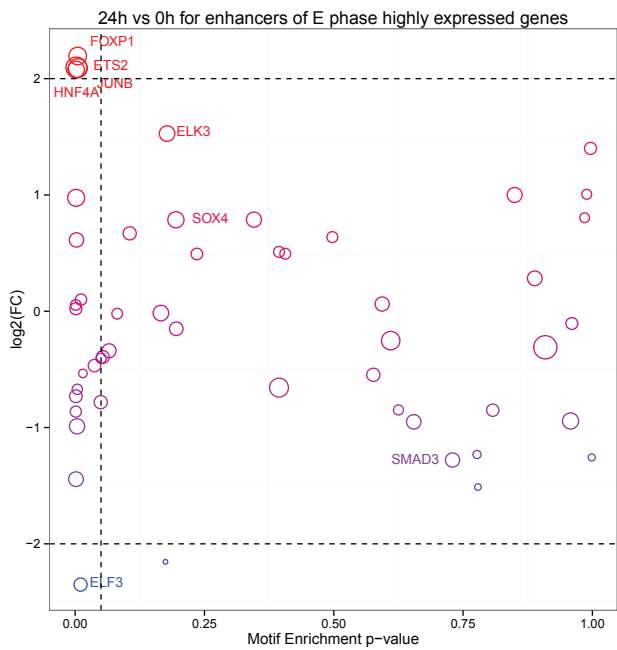**C**

## Gene body enhancers

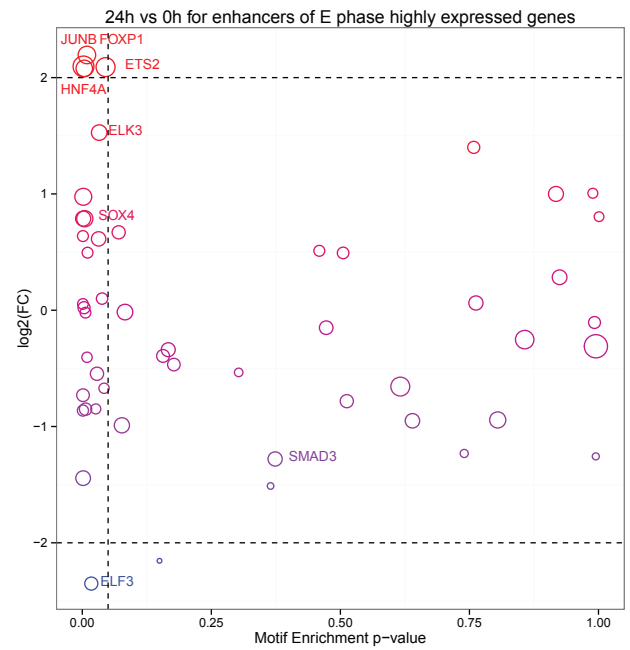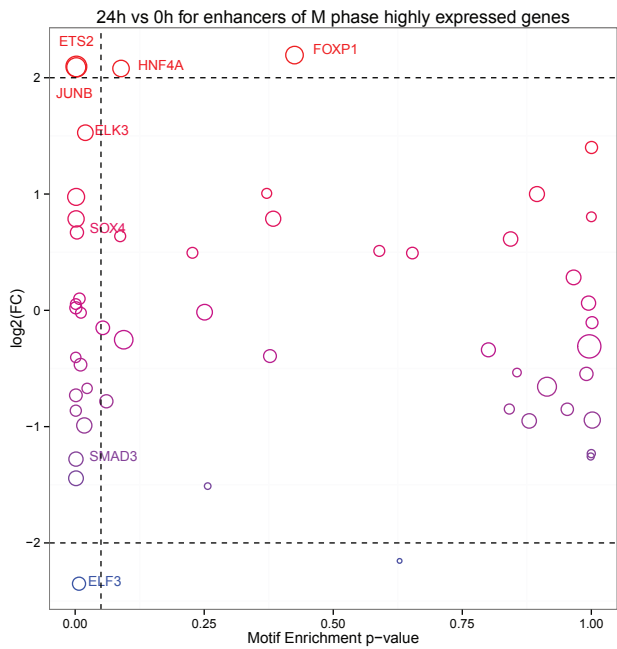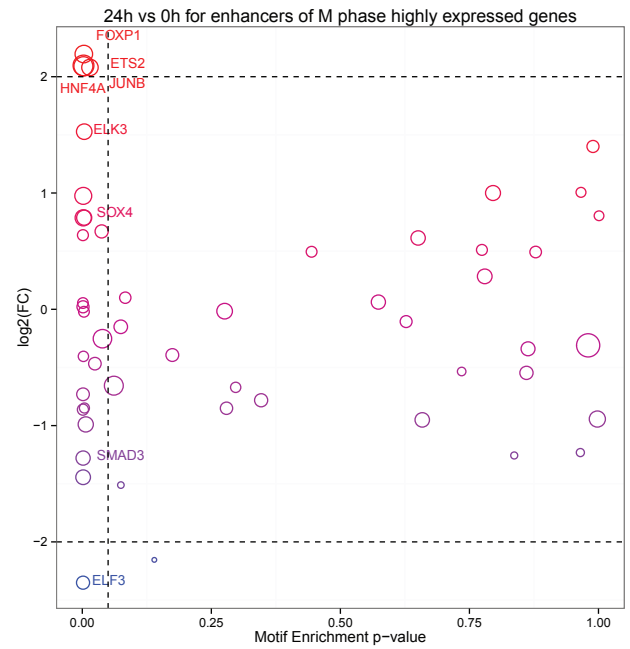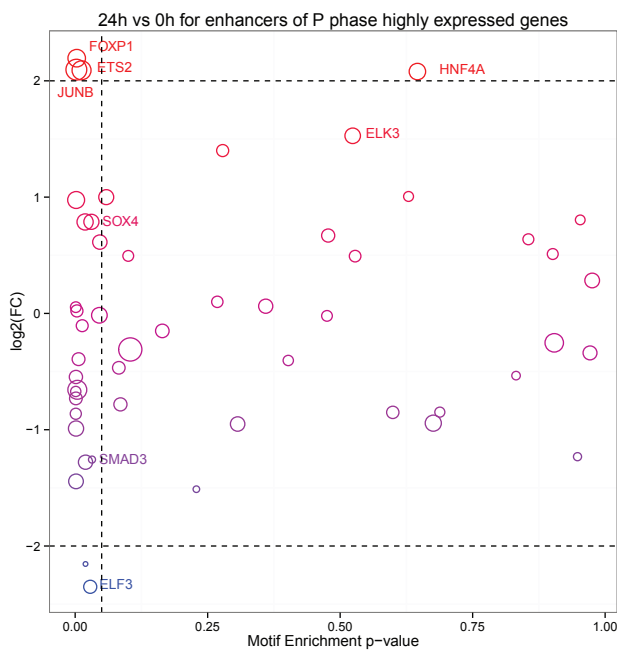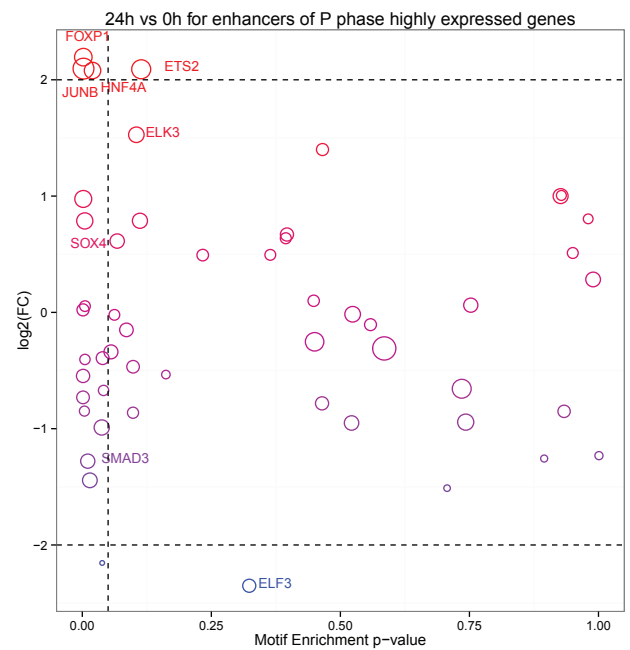

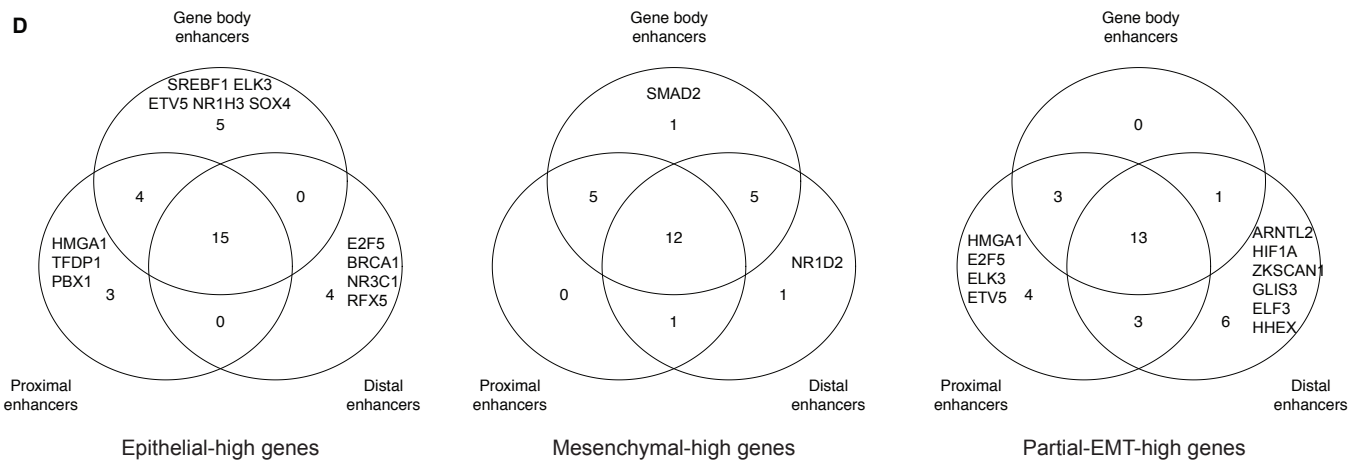

**Figure S4. ETS2, HNF4A, JUNB and FOXP1 are putative master TFs for EMT.**

(A) Enrichment p-values of TF binding motifs in the proximal enhancers of epithelial high genes (x-axis) are plotted against expression changes during EMT (y-axis; 24 h vs. 0 h, right panel; 72 h vs. 0 h, left panel). Each circle represents a TF. Dotted lines represent the cutoff for enrichment ( $p$ -value  $< 0.05$ ) and differential expression (absolute fold change  $\geq 2$ ). (B) Same as (A) but with Enrichment p-values calculated from distal enhancers. (C) Same as (A) but with Enrichment p-values calculated from gene body enhancers. (D) Venn diagrams showing the overlap of TFs enriched in proximal enhancers, distal enhancers and gene body enhancers for epithelial-high, partial-EMT-high and mesenchymal-high genes.

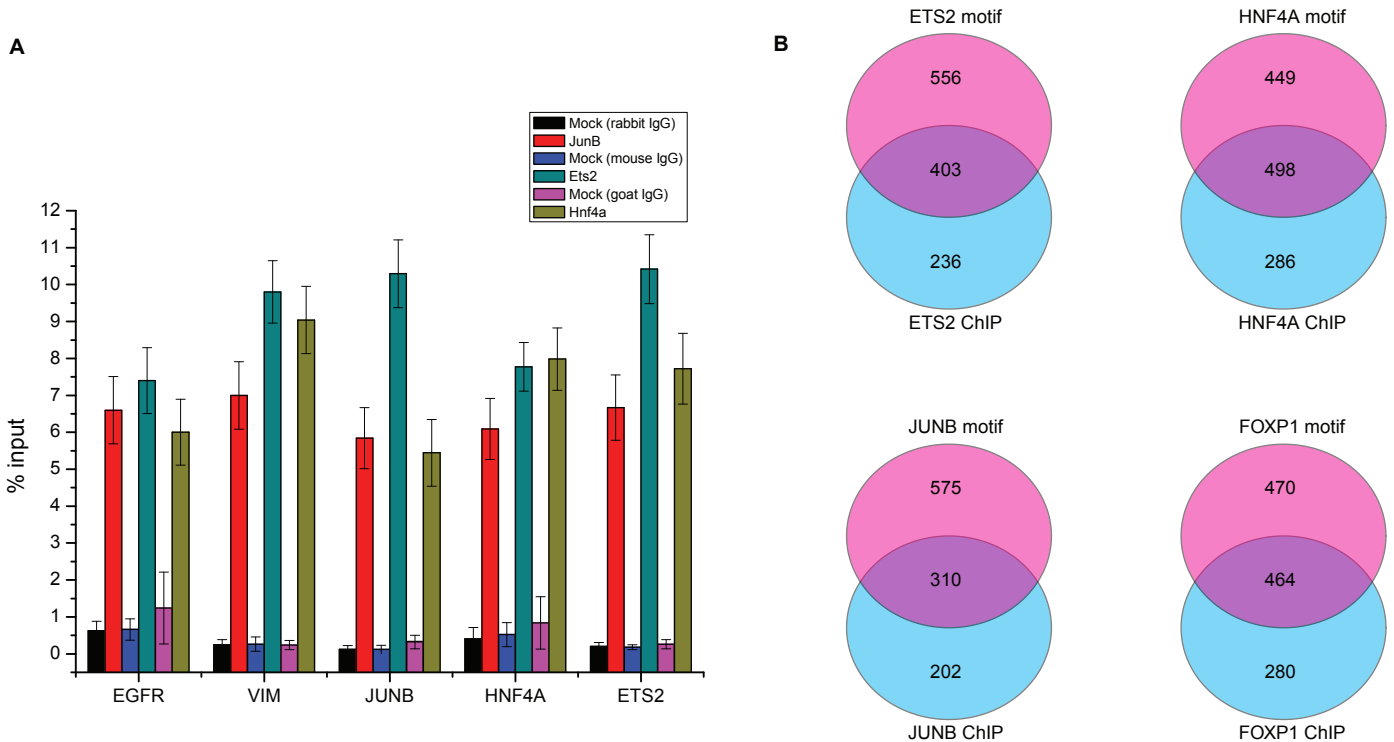

**Figure S5. ChIP data supports that ETS2, HNF4A and JUNB are master TFs for EMT.**

(A) ChIP-qPCR analyses showing the binding of ETS2, HNF4A and JUNB to selected EMT gene enhancers. (B) Venn diagrams depicting the overlap between target EMT genes predicted by presence of binding motif in enhancers (upper circle) or ChIP-seq peak in enhancers (lower circle).

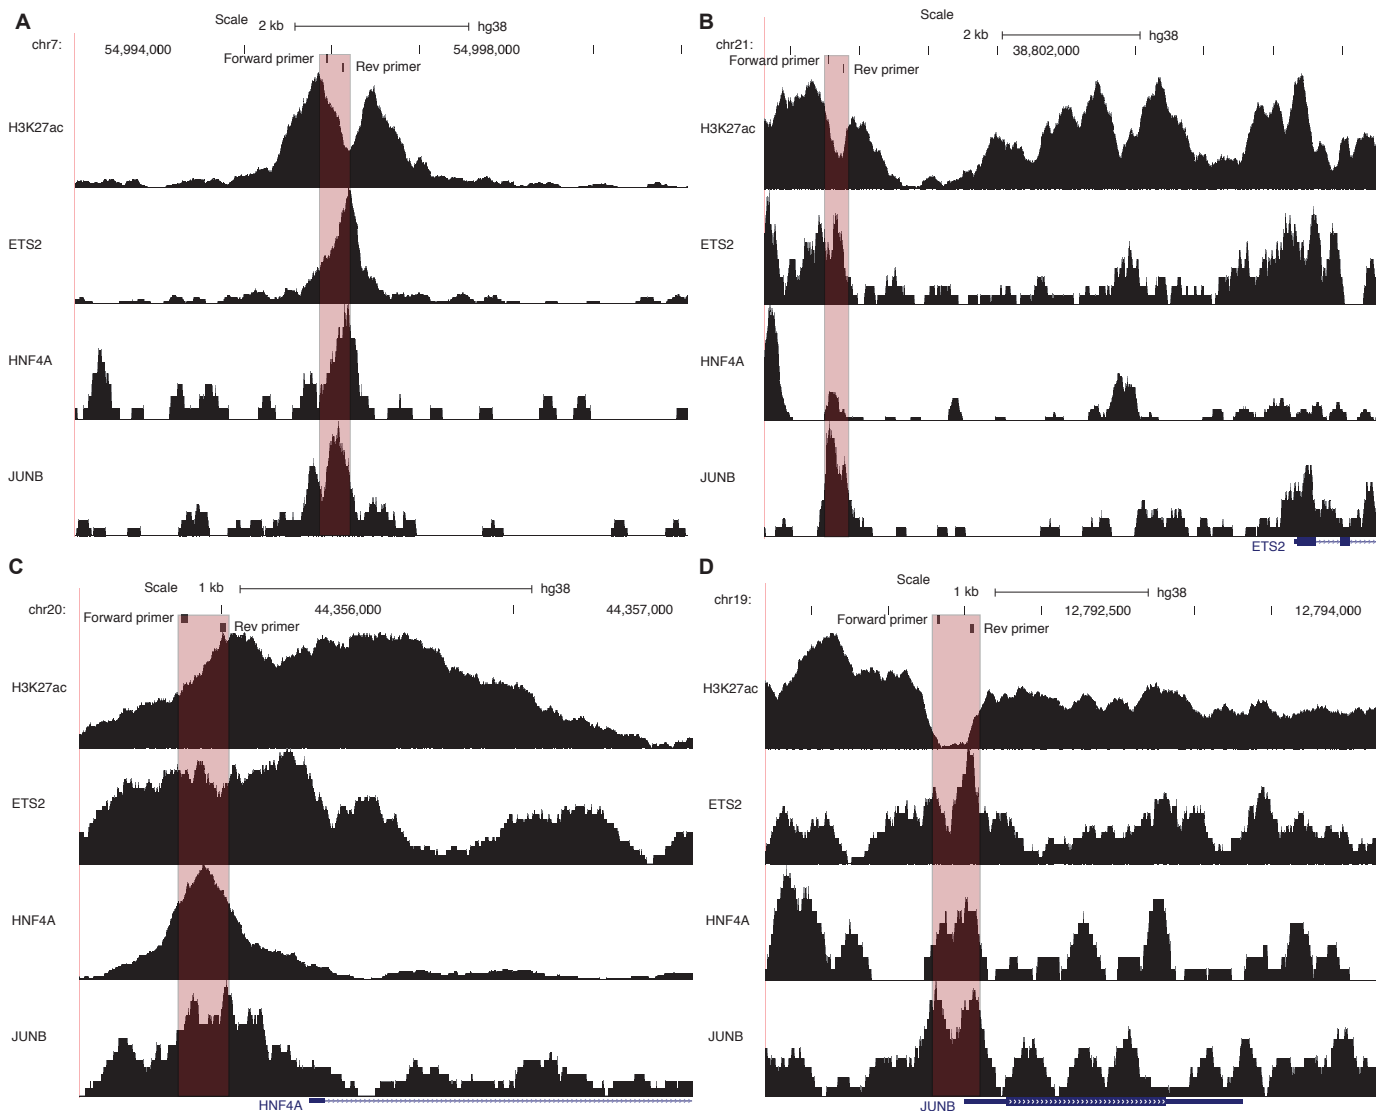

**Figure S6. Cumulative binding of ETS2, HNF4A and JUNB at EMT-associated enhancers.** (A-D) Genome browser tracks showing the cumulative binding of ETS2, HNF4A and JUNB at enhancers near EGFR (A), ETS2 (B), HNF4A (C) and JUNB (D). The pink rectangles highlight the regions targeted by ChIP-qPCR primers.

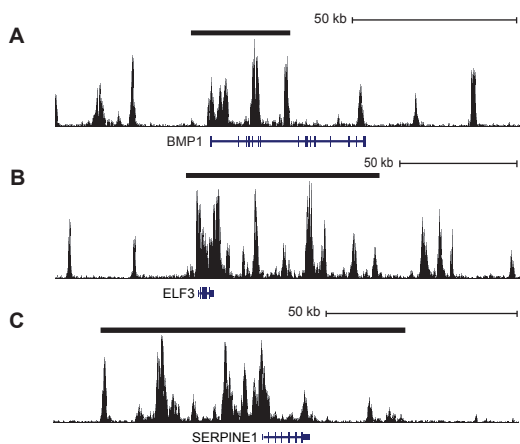

**Figure S7. Key EMT genes are associated with super-enhancers.** (A-C) Genome browser representation of super-enhancers associated with BMP1, ELF3 and SERPINE1.

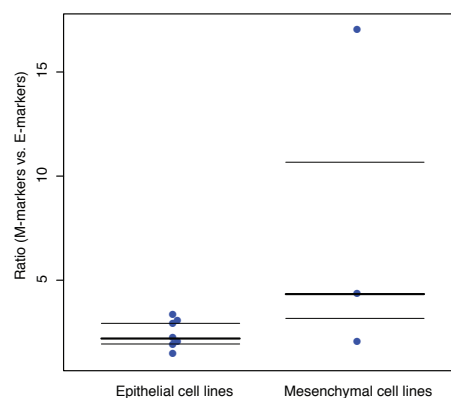

**Figure S8. The distribution of E-markers associated with super-enhancers vs. M-markers associated with super-enhancers.** Scatter plots showing the distribution of the ratios between M-markers associated with super-enhancers vs. E-markers associated with super-enhancers.

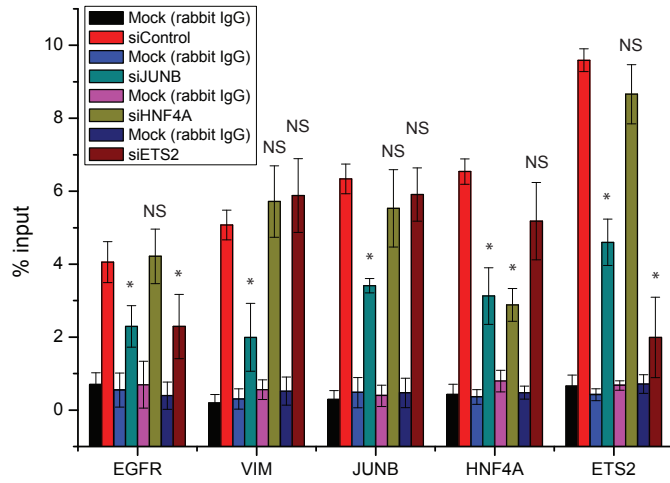

**Figure S9. BRD4 bound to sites occupied by ETS2, HNF4A and JUNB.**

ChIP-qPCR analyses showing the binding of BRD4 to sites co-bound by ETS2 HNF4A and JUNB and the effects of siETS2, siHNF4A and siJUNB on BRD4 binding. NS = not significant; \* =  $p < 0.01$ .

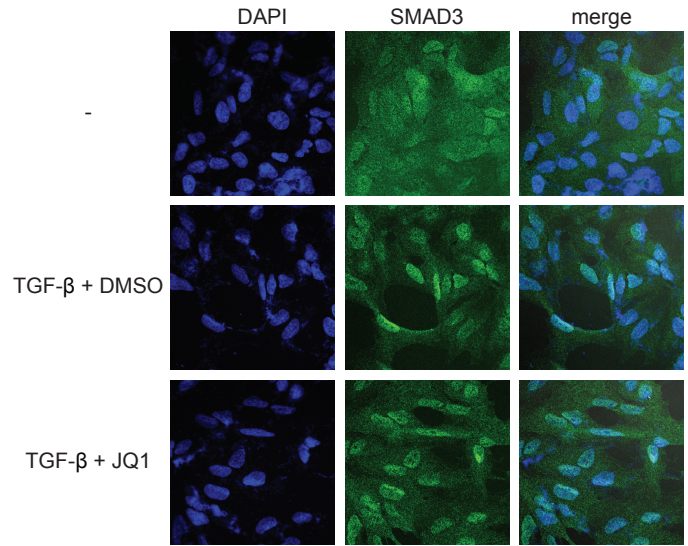

**Figure S10. JQ1 didn't disrupt SMAD3 functionality.** Immunofluorescence staining for SMAD3 in A549 cells stimulated with TGF- $\beta$  for 24 h in the presence of JQ1 or DMSO.
